# Supplementary figures and images for: Sex differentiation and the effect of post-larval cannibalism on the sex ratio in Brycon orbignyanus assessed by gonadal morphology and gene expression analysis
Source: Research Square preprint supplement (doi:10.21203/rs.3.rs-7151879/v1), 2025-09-02

**Figure S2**

**
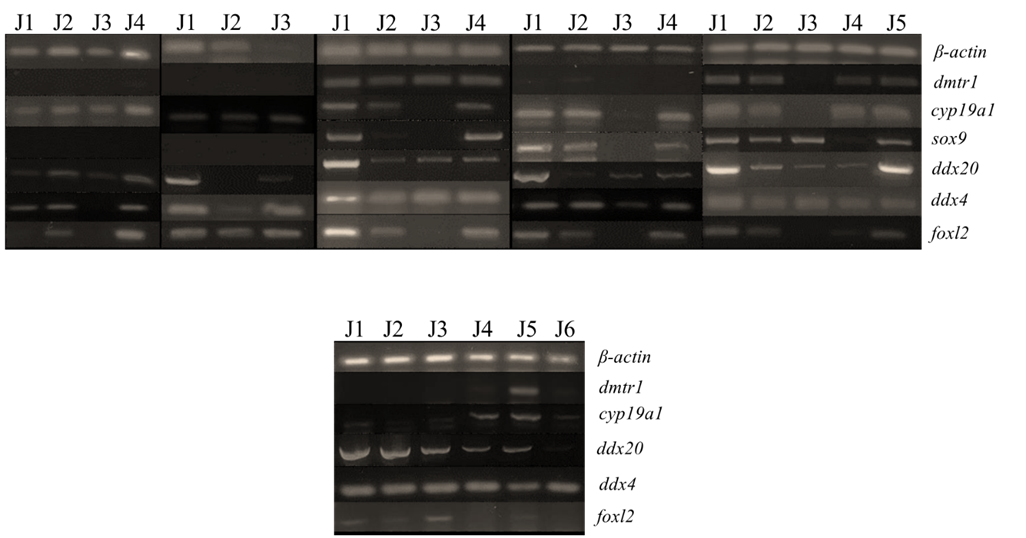
**

Supplement: Supplementary file 1 [file b9208f2587f946f15cb731b7.docx]

**Figure S1**

**
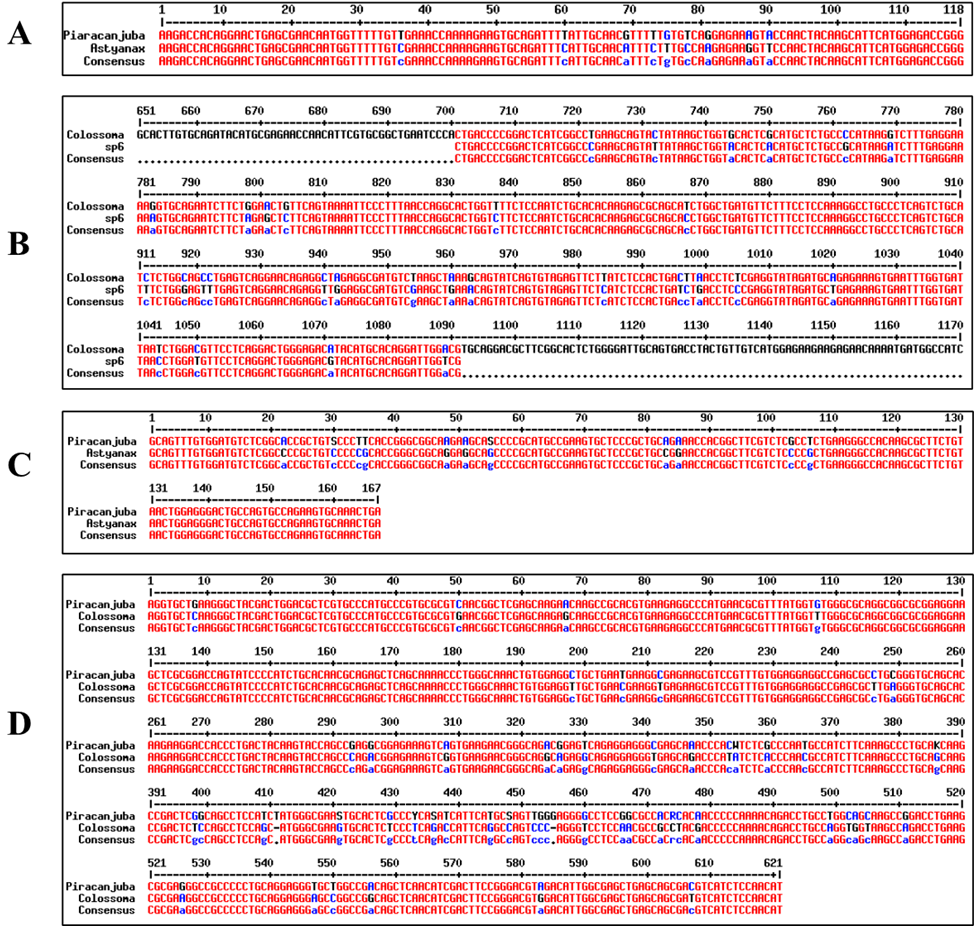
**

Supplement: Supplementary file 2 [file c2ccc3aea6d821c1731426d0.docx]
